# Supplementary material for: Soil bacterial quantification approaches coupling with relative abundances reflecting the changes of taxa
Source: PubMed Central journal article supplement (PMC5500469; doi:10.1038/s41598-017-05260-w), 2017-07-06
Supplement: 41598_2017_5260_MOESM1_ESM.pdf [file 41598_2017_5260_MOESM1_ESM.pdf]

1 ***Supplementary Information for Scientific Reports***

2 **Soil microbial quantification approaches coupling with relative abundances reflecting the changes of**  
3 **taxa in different locations**

4 **Zhaojing Zhang<sup>1,2</sup>, Yuanyuan Qu<sup>1,\*</sup>, Shuzhen Li<sup>1,2</sup>, Kai Feng<sup>2</sup>, Shang Wang<sup>2</sup>, Weiwei Cai<sup>2,3</sup>, Yuting Liang<sup>4</sup>, Hui**  
5 **Li<sup>5</sup>, Meiyang Xu<sup>6</sup>, Huaqun Yin<sup>7</sup> & Ye Deng<sup>2,8,\*</sup>**

6 <sup>1</sup>State Key Laboratory of Industrial Ecology and Environmental Engineering (Ministry of Education, China), School of  
7 Environmental Science and Technology, Dalian University of Technology, Dalian 116024, China. <sup>2</sup>Key Laboratory of  
8 Environmental Biotechnology, Research Center for Eco-Environmental Science, Chinese Academy of Sciences, Beijing  
9 100085, China. <sup>3</sup>State Key Laboratory of Urban Water Resource and Environment, Harbin Institute of Technology  
10 (SKLUWRE, HIT), Harbin 150090, China. <sup>4</sup>State Key Laboratory of Soil and Sustainable Agriculture, Institute of Soil  
11 Science, Chinese Academy of Sciences, Nanjing 210008, China. <sup>5</sup>State Key Laboratory of Forest and Soil Ecology,  
12 Institute of Applied Ecology, Chinese Academy of Sciences, Shenyang 110016, China. <sup>6</sup>State Key Laboratory of  
13 Applied Microbiology Southern China, Guangdong Institute of Microbiology, Guangzhou 510070, China. <sup>7</sup>School  
14 of Minerals Processing and Bioengineering, Central South University, Changsha 410083, China. <sup>8</sup>College of Resources  
15 and Environment, University of Chinese Academy of Sciences, Beijing 100190, China.

16

17 \*Correspondence and requests for materials should be addressed to Y. D. (email: [yedeng@rcees.ac.cn](mailto:yedeng@rcees.ac.cn)) or Y. Q. (email:  
18 [qyy@dlut.edu.cn](mailto:qyy@dlut.edu.cn))

19 Ye Deng, Key Laboratory of Environmental Biotechnology, Research Center for Eco-Environmental Science, Chinese  
20 Academy of Sciences, Beijing 100085, China. Tel, +86-10-62840082.

21 Yuanyuan Qu, State Key Laboratory of Industrial Ecology and Environmental Engineering (Ministry of Education,  
22 China), School of Environmental Science and Technology, Dalian University of Technology, Dalian 116024, China.  
23 Tel, +86-411-84706250.

24 **Supplementary Table S1. Summary of soil characteristics of the two sampling sites in this study.**

| Location | Elevation (m) | Latitude    | Soil pH <sup>a</sup> | Soil moisture (%) | Total carbon content (TOC, mg/g) |
|----------|---------------|-------------|----------------------|-------------------|----------------------------------|
| Beijing  | 810-1349      | 40°31'10"N  | 6.17±0.48            | 21.49±7.35        | 46.69±27.96                      |
|          |               | 115°49'32"E |                      |                   |                                  |
| Tibet    | 5088-5116     | 29°36'21"N  | 6.53±0.22            | 1.50±0.35         | 26.28±5.27                       |
|          |               | 85°45'09"E  |                      |                   |                                  |

25 <sup>a</sup> Average individual soil variables (pH, moisture, and TOC) over 10 samples.

26 **Supplementary Table S2. Dissimilarity tests of microbial communities from two sampling sites<sup>a</sup>.**

| Dissimilarity<br>Beijing vs. Tibet | MRPP <sup>b</sup> |                  | ANOSIM <sup>c</sup> |              | ADONIS <sup>d</sup> |              |
|------------------------------------|-------------------|------------------|---------------------|--------------|---------------------|--------------|
|                                    | $\delta$          | <i>P</i>         | <i>R</i>            | <i>P</i>     | <i>F</i>            | <i>P</i>     |
| Total                              | 0.715             | <b>0.002</b>     | 0.288               | <b>0.002</b> | 0.14                | <b>0.001</b> |
| Proteobacteria                     | 0.708             | <b>0.003</b>     | 0.269               | <b>0.005</b> | 0.139               | <b>0.001</b> |
| Actinobacteria                     | 0.693             | <b>0.003</b>     | 0.233               | <b>0.007</b> | 0.122               | <b>0.003</b> |
| Acidobacteria                      | 0.713             | <b>0.002</b>     | 0.256               | <b>0.002</b> | 0.139               | <b>0.002</b> |
| Bacteroidetes                      | 0.755             | <b>&lt;0.001</b> | 0.347               | <b>0.001</b> | 0.146               | <b>0.002</b> |
| Verrucomicrobia                    | 0.698             | <b>&lt;0.001</b> | 0.318               | <b>0.003</b> | 0.16                | <b>0.003</b> |
| Planctomycetes                     | 0.798             | <b>0.002</b>     | 0.379               | <b>0.001</b> | 0.125               | <b>0.001</b> |
| Chloroflexi                        | 0.72              | <b>0.005</b>     | 0.271               | <b>0.004</b> | 0.139               | <b>0.007</b> |
| Gemmatimonadetes                   | 0.715             | <b>&lt;0.001</b> | 0.269               | <b>0.003</b> | 0.148               | <b>0.001</b> |
| Crenarchaeota                      | 0.699             | <b>0.002</b>     | 0.223               | <b>0.01</b>  | 0.142               | <b>0.004</b> |
| Cyanobacteria                      | 0.866             | <b>0.003</b>     | 0.213               | <b>0.015</b> | 0.109               | <b>0.004</b> |

27 <sup>a</sup>Different statistical approaches were used with Bray-Curtis distances, and *P* values were of corresponding significance

28 tests.

29 <sup>b</sup>MRPP, multiresponse permutation procedure.

30 <sup>c</sup>ANOSIM, analysis of similarity.

31 <sup>d</sup>ADONIS, permutational multivariate analysis of variance with the Adonis function.

32 **Supplementary Table S3. Spearman and Kendall rank correlation (r values, n=20) between different**  
 33 **measurements.**

| Spearman correlation | ATP | FCM            | qPCR           | PLFA           | MBC    |
|----------------------|-----|----------------|----------------|----------------|--------|
| ATP                  | 1   | <b>0.839**</b> | <b>0.793**</b> | <b>0.496**</b> | -0.179 |
| FCM                  |     | 1              | <b>0.854**</b> | <b>0.518**</b> | -0.245 |
| qPCR                 |     |                | 1              | <b>0.504**</b> | -0.181 |
| PLFA                 |     |                |                | 1              | -0.142 |
| MBC                  |     |                |                |                | 1      |
| Kendall correlation  | ATP | FCM            | qPCR           | PLFA           | MBC    |
| ATP                  | 1   | <b>0.642**</b> | <b>0.586**</b> | <b>0.311*</b>  | -0.132 |
| FCM                  |     | 1              | <b>0.670**</b> | <b>0.364*</b>  | -0.111 |
| qPCR                 |     |                | 1              | <b>0.402**</b> | -0.085 |
| PLFA                 |     |                |                | 1              | -0.085 |
| MBC                  |     |                |                |                | 1      |

34 \*:  $P < 0.05$ ; \*\*:  $P < 0.01$

35

36 **Supplementary Table S4. Correlation tests (r values, n=20) between different measurements and the**  
37 **environmental factors.**

| Pearson correlation | Moisture        | TOC             |
|---------------------|-----------------|-----------------|
| ATP                 | <b>0.806***</b> | <b>0.708***</b> |
| FCM                 | <b>0.803***</b> | <b>0.697**</b>  |
| qPCR                | <b>0.679***</b> | <b>0.748***</b> |
| PLFA                | <b>0.650**</b>  | <b>0.626**</b>  |
| MBC                 | -0.245          | 0.041           |

38 \*\*:  $P < 0.01$ ; \*\*\* :  $P < 0.001$

39 **Supplementary Table S5. Correlation tests (r values, n=20) between the environmental factors and the EAA of**  
 40 **the major phyla based on the ATP measurement.**

| Pearson correlation | Moisture        | TOC            |
|---------------------|-----------------|----------------|
| Proteobacteria      | <b>0.784**</b>  | <b>0.585**</b> |
| Acidobacteria       | <b>0.698**</b>  | <b>0.511*</b>  |
| Actinobacteria      | <b>0.741**</b>  | <b>0.608**</b> |
| Bacteroidetes       | <b>0.575**</b>  | <b>0.528*</b>  |
| Verrucomicrobia     | <b>0.595**</b>  | <b>0.508*</b>  |
| Chloroflexi         | <b>0.665**</b>  | <b>0.512*</b>  |
| Gemmatimonadetes    | <b>0.651**</b>  | 0.433          |
| Planctomycetes      | <b>0.706**</b>  | <b>0.577**</b> |
| Cyanobacteria       | <b>-0.596**</b> | -0.227         |

41 \*:  $P < 0.05$ ; \*\*:  $P < 0.01$

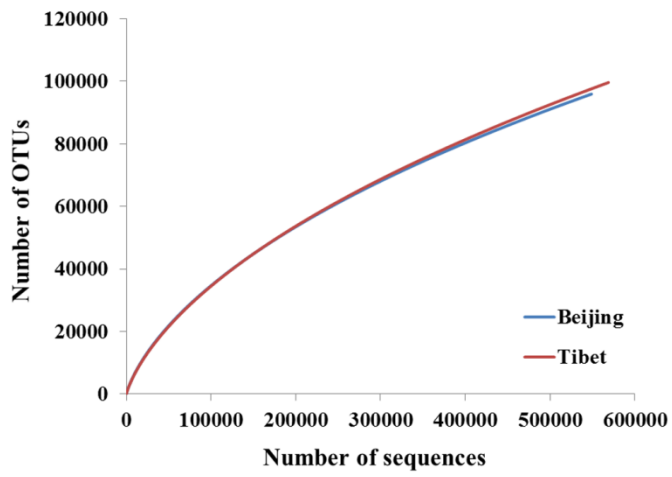

42

43 **Supplementary Figure S1. Rarefaction curves based on 16S rRNA gene amplicon sequencing of soil microbial**

44 **communities.**

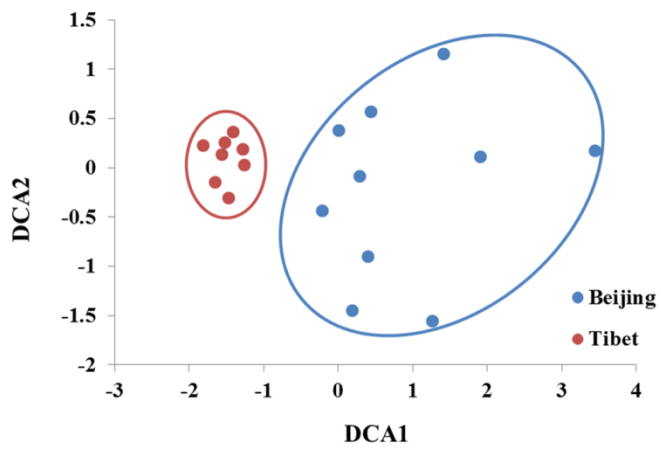

45

46 **Supplementary Figure S2. Detrended correspondence analysis (DCA) of microbial community composition in**

47 **Beijing and Tibet sampling sites based on 16S rRNA gene sequencing.**



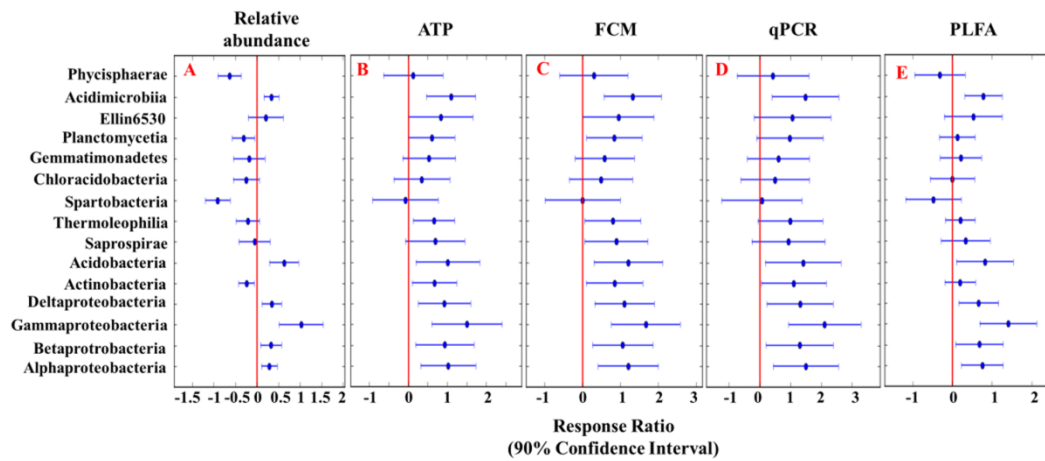

48

49 **Supplementary Figure S3. Response ratio for the differences between the relative abundances and absolute**  
50 **abundances of the major class in the two sampling sites.** Significance was determined using the response ratio  
51 analysis at a 95% confidence level. The 95% CI of a response variable without overlapping with zero represent a  
52 significant result, otherwise, with non-significance. The vertical solid line was drawn when the variables of Beijing  
53 samples equaled with those of Tibet samples.

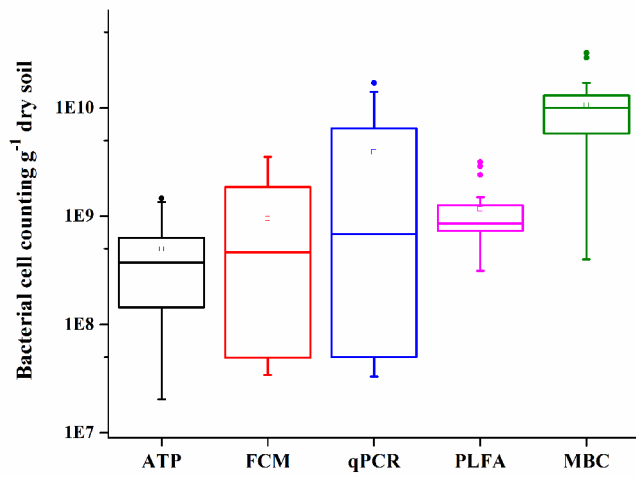

54

55 **Supplementary Figure S4. Bacterial cell numbers assessed by five different methods in Beijing and Tibet sites.**

56 Horizontal lines show median values, □ indicate mean values, boxes denote values comprised within the lower and

57 upper quartile of the data, the vertical lines represent ranges, and • indicate outliers.
